# Supplementary material for: Development and Interpretation of a Clinicopathological-Based Model for the Identification of Microsatellite Instability in Colorectal Cancer
Source: Hindawi journal article supplement (doi:10.1155/2023/5178750), 2023-02-18

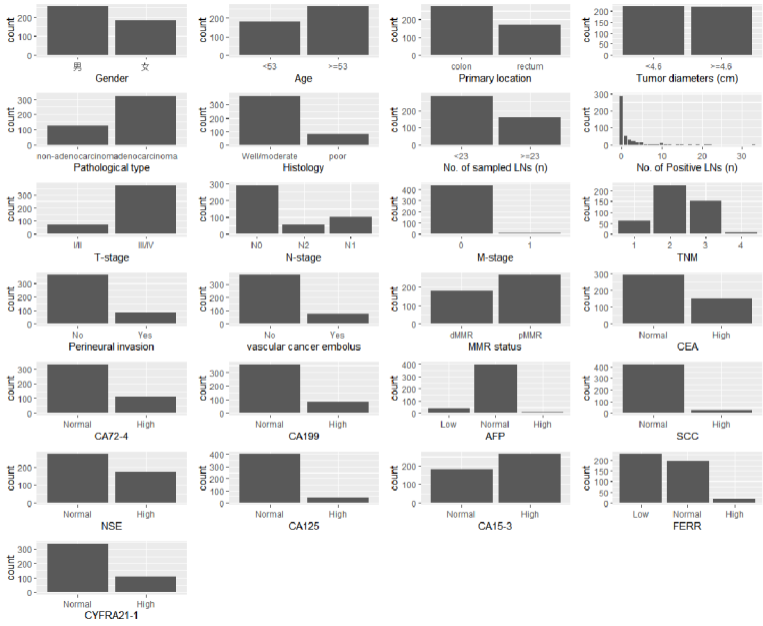

Supplement: f1 [file 5178750.f1.pdf]
