# Supplementary material for: Development and Interpretation of a Clinicopathological-Based Model for the Identification of Microsatellite Instability in Colorectal Cancer
Source: Hindawi journal article supplement (doi:10.1155/2023/5178750), 2023-02-18

24 23 23 21 20 19 20 17 16 13 10 9 6 4 2 1

Binomial Deviance

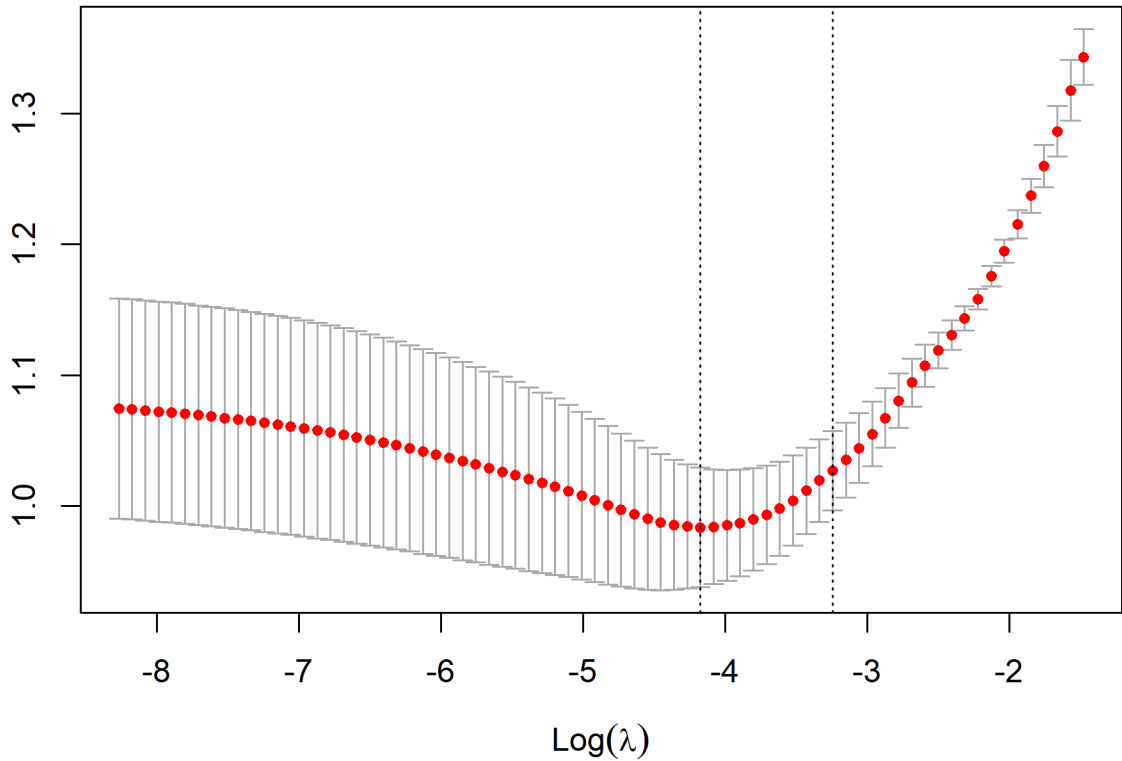

Supplement: f3 [file 5178750.f3.pdf]
